# Supplementary material
Source: publisher site journal article supplement (https://www.dovepress.com/get_supplementary_file.php?f=318991.docx)
Supplement: Supplementary file 1 [file get_supplementary_file.php]

**SUPPLEMENTARY MATERIALS**

**Multicellular spheroids formation on hydrogel enhances osteogenic/odontogenic differentiation of dental pulp stem cells under magnetic nanoparticles induction**

Xiao Han1,2; Shijia Tang1; Lin Wang1; Xueqin Xu2; Ruhan Yan2; Sen Yan3; Zhaobin Guo4; Ke Hu1,2; Tingting Yu5; Mengping Li2; Yuqin Li2; Feimin Zhang1,2*; Ning Gu2,3*

1. Jiangsu Key Laboratory of Oral Diseases, Affiliated Hospital of Stomatology, Nanjing Medical University, Nanjing, Jiangsu, China

2. Laboratory of Oral Regenerative Medicine Technology, School of Biomedical Engineering and Informatics, Department of Biomedical Engineering, Nanjing Medical University, Nanjing, Jiangsu, China

3. Jiangsu Key Laboratory for Biomaterials and Devices, School of Biological Science and Medical Engineering, Southeast University, Nanjing, Jiangsu, China

4. Institute for Nanobiotechnology, Johns Hopkins University, Baltimore, MD, United States

5. Department of Medical Genetics, School of Basic Medical Science & Jiangsu Key Laboratory of Xenotransplantation, Nanjing Medical University, Nanjing, Jiangsu, China

AUTHOR INFORMATION

**Corresponding Authors**

*E-mail: fmzhang@njmu.edu.cn (F.Z.) Fax: +86-25-86516414

*E-mail: guning@seu.edu.cn (N.G.) Fax: +86-25-83272460.

**T****able S1: Primer sequences of real time RT-PCR**

| **Genes** | **Accession Numbers** | **Primer sequences** | |
| --- | --- | --- | --- |
| Nanog | NM_024865.4 | (Forward) | 5’GATGCAAGAACTCTCCAACATC 3’ |
| (Reverse) | 5’CTGGTGGTAGGAAGAGTAAAGG 3’ |
| SOX2 | NM_003106.4 | (Forward) | 5’CAGCATGTCCTACTCGCAGCAG 3’ |
| (Reverse) | 5’CTGGAGTGGGAGGAAGAGGTAACC 3’ |
| OCT4 | NC_000006.12 | (Forward) | 5’GTGGTCCGAGTGTGGTTCTGTAAC 3’ |
| (Reverse) | 5’CCCAGCAGCCTCAAAATCCTCTC 3’ |
| ALP | NM000478.5 | (Forward) | 5’ GACCTCCTCGGAAGACACTC 3’ |
| (Reverse) | 5’ TGAAGGGCTTCTTGTCTGTG 3’ |
| RUNX2 | NM001024630.3 | (Forward) | 5’ ATGATGACACTGCCACCTCTG 3’ |
| (Reverse) | 5’ GGCTGGATAGTGCATTCGTG 3’ |
| OCN | NM199173.5 | (Forward) | 5’ CTTTGTGTCCAAGCAGGAGG 3’ |
| (Reverse) | 5’ CTGAAAGCCGATGTGGTCAG 3’ |
| DSPP | NM_014208.3 | (Forward) | 5’ GCTGGAAGCAATAACAGTACAG 3’ |
| (Reverse) | 5’ TGCTGTTGATCTGAGGTGTTAT 3’ |
| BMP2 | NM_001200.4 | (Forward) | 5’ ACCCGCTGTCTTCTAGCGT 3’ |
| (Reverse) | 5’ TTTCAGGCCGAACATGCTGAG 3’ |
| GAPDH | NM_002046 | (Forward) | 5’ CAGGAGGCATTGCTGATGAT 3’ |
| (Reverse) | 5’ GAAGGCTGGGGCTCATTT 3’ |

|  | Control | Gel-MLCs | Gel-MCSs |
| --- | --- | --- | --- |
| Nanog | 1.04±0.35 | 0.86±0.22 | 5.35±0.57 |
| SOX2 | 1.00±0.01 | 0.35±0.01 | 3.30±0.15 |
| OCT4 | 1.01±0.13 | 1.22±0.06 | 4.24±0.71 |

**Table S2: Relative mRNA expression of pluripotency makers. Values are mean ± SD, n≥3.**

**Table S3: Relative mRNA expression of osteogenic/odontogenic differentiation makers at 7 days. Values are mean ± SD, n≥3.**

|  | Control | Gel-MLCs | Gel-MCSs |
| --- | --- | --- | --- |
| ALP | 1.01±0.19 | 1.04±0.32 | 3.26±0.26 |
| RUNX2 | 1.00±0.07 | 0.65±0.04 | 1.96±0.09 |
| OCN | 1.00±0.12 | 0.83±0.03 | 2.41±0.07 |
| DSPP | 0.97±0.04 | 0.49±0.11 | 1.46±0.09 |
| BMP2 | 1.00±0.03 | 1.88±0.17 | 3.73±0.35 |

**Table S4: Relative mRNA expression of osteogenic/odontogenic differentiation makers at 14 days. Values are mean ± SD, n≥3.**

|  | Control | Gel-MLCs | Gel-MCSs |
| --- | --- | --- | --- |
| ALP | 1.00±0.03 | 0.76±0.02 | 1.69±0.39 |
| RUNX2 | 1.00±0.78 | 1.26±0.06 | 1.72±0.04 |
| OCN | 1.01±0.13 | 0.99±0.11 | 1.30±0.11 |
| DSPP | 1.01±0.20 | 0.86±0.20 | 1.92±0.11 |
| BMP2 | 1.01±0.13 | 4.68±0.73 | 7.09±1.22 |

**Table S5: ALP activity at day 7 and 14. Values are mean ± SD, n≥3.**

|  | Control | Gel-MLCs | Gel-MCSs |
| --- | --- | --- | --- |
| 7d | 0.13±0.001 | 0.08±0.002 | 0.26±0.007 |
| 14d | 0.30±0.005 | 0.29±0.006 | 0.64±0.014 |

**Table S6: Relative mRNA expression of osteogenic differentiation makers at 7 days for cells with IONPs induction. Values are mean ± SD, n≥3.**

|  | MLCs  γ-Fe2O3@PSC | MLCs  γ-Fe2O3@PSC/PLL | MCSs  γ-Fe2O3@PSC | MCSs  γ-Fe2O3@PSC/PLL |
| --- | --- | --- | --- | --- |
| ALP | 1.00±0.03 | 1.18±0.06 | 1.44±0.06 | 1.45±0.15 |
| RUNX2 | 1.00±0.03 | 1.37±0.08 | 1.68±0.01 | 2.94±0.03 |
| OCN | 1.00±0.03 | 1.24±0.06 | 1.53±0.10 | 2.01±0.03 |
| BMP2 | 1.00±0.09 | 2.38±0.03 | 2.47±0.09 | 3.47±0.60 |

**Table S7: Relative mRNA expression of osteogenic differentiation makers at 14 days for cells with IONPs induction. Values are mean ± SD, n≥3.**

|  | MLCs  γ-Fe2O3@PSC | MLCs  γ-Fe2O3@PSC/PLL | MCSs  γ-Fe2O3@PSC | MCSs  γ-Fe2O3@PSC/PLL |
| --- | --- | --- | --- | --- |
| ALP | 1.00±0.04 | 0.89±0.12 | 1.24±0.01 | 1.37±0.11 |
| RUNX2 | 1.00±0.10 | 1.56±0.11 | 1.36±0.02 | 1.62±0.07 |
| OCN | 1.01±0.01 | 1.60±0.12 | 1.60±0.01 | 2.44±0.05 |
| BMP2 | 1.00±0.05 | 1.29±0.01 | 1.85±0.07 | 3.15±0.12 |

**Table S8: ALP activity at day 7 for cells with IONPs induction. Values are mean ± SD, n≥3.**

|  | MLCs  γ-Fe2O3@PSC | MLCs  γ-Fe2O3@PSC/PLL | MCSs  γ-Fe2O3@PSC | MCSs  γ-Fe2O3@PSC/PLL |
| --- | --- | --- | --- | --- |
| 7d | 0.62±0.26 | 1.78±0.54 | 1.95±0.36 | 4.46±0.08 |


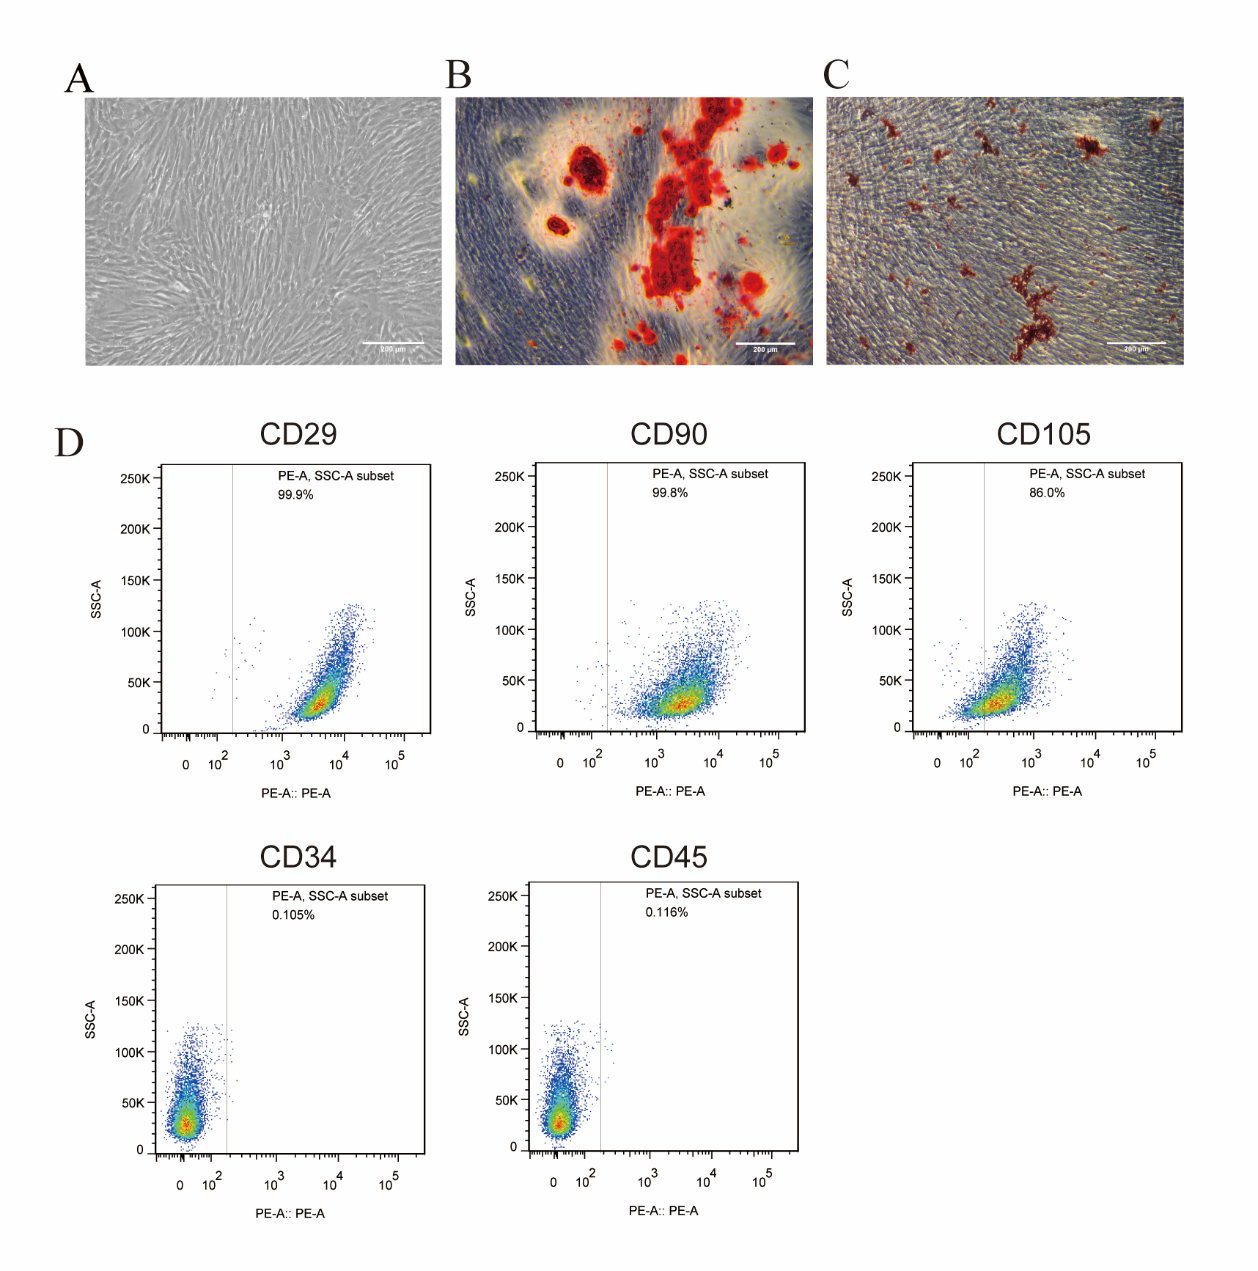


**Figure S1:** Characterization of DPSCs. **(A)** Morphology of DPSCs in the bright light of microscope. Scale bar: 200 μm. **(B)** ARS staining for osteogenic differentiation and **(C)** Oil red O staining for adipogenic differentiation. Scale bar: 200 μm. **(D)** Flow cytometry results of surface markers for stem cells


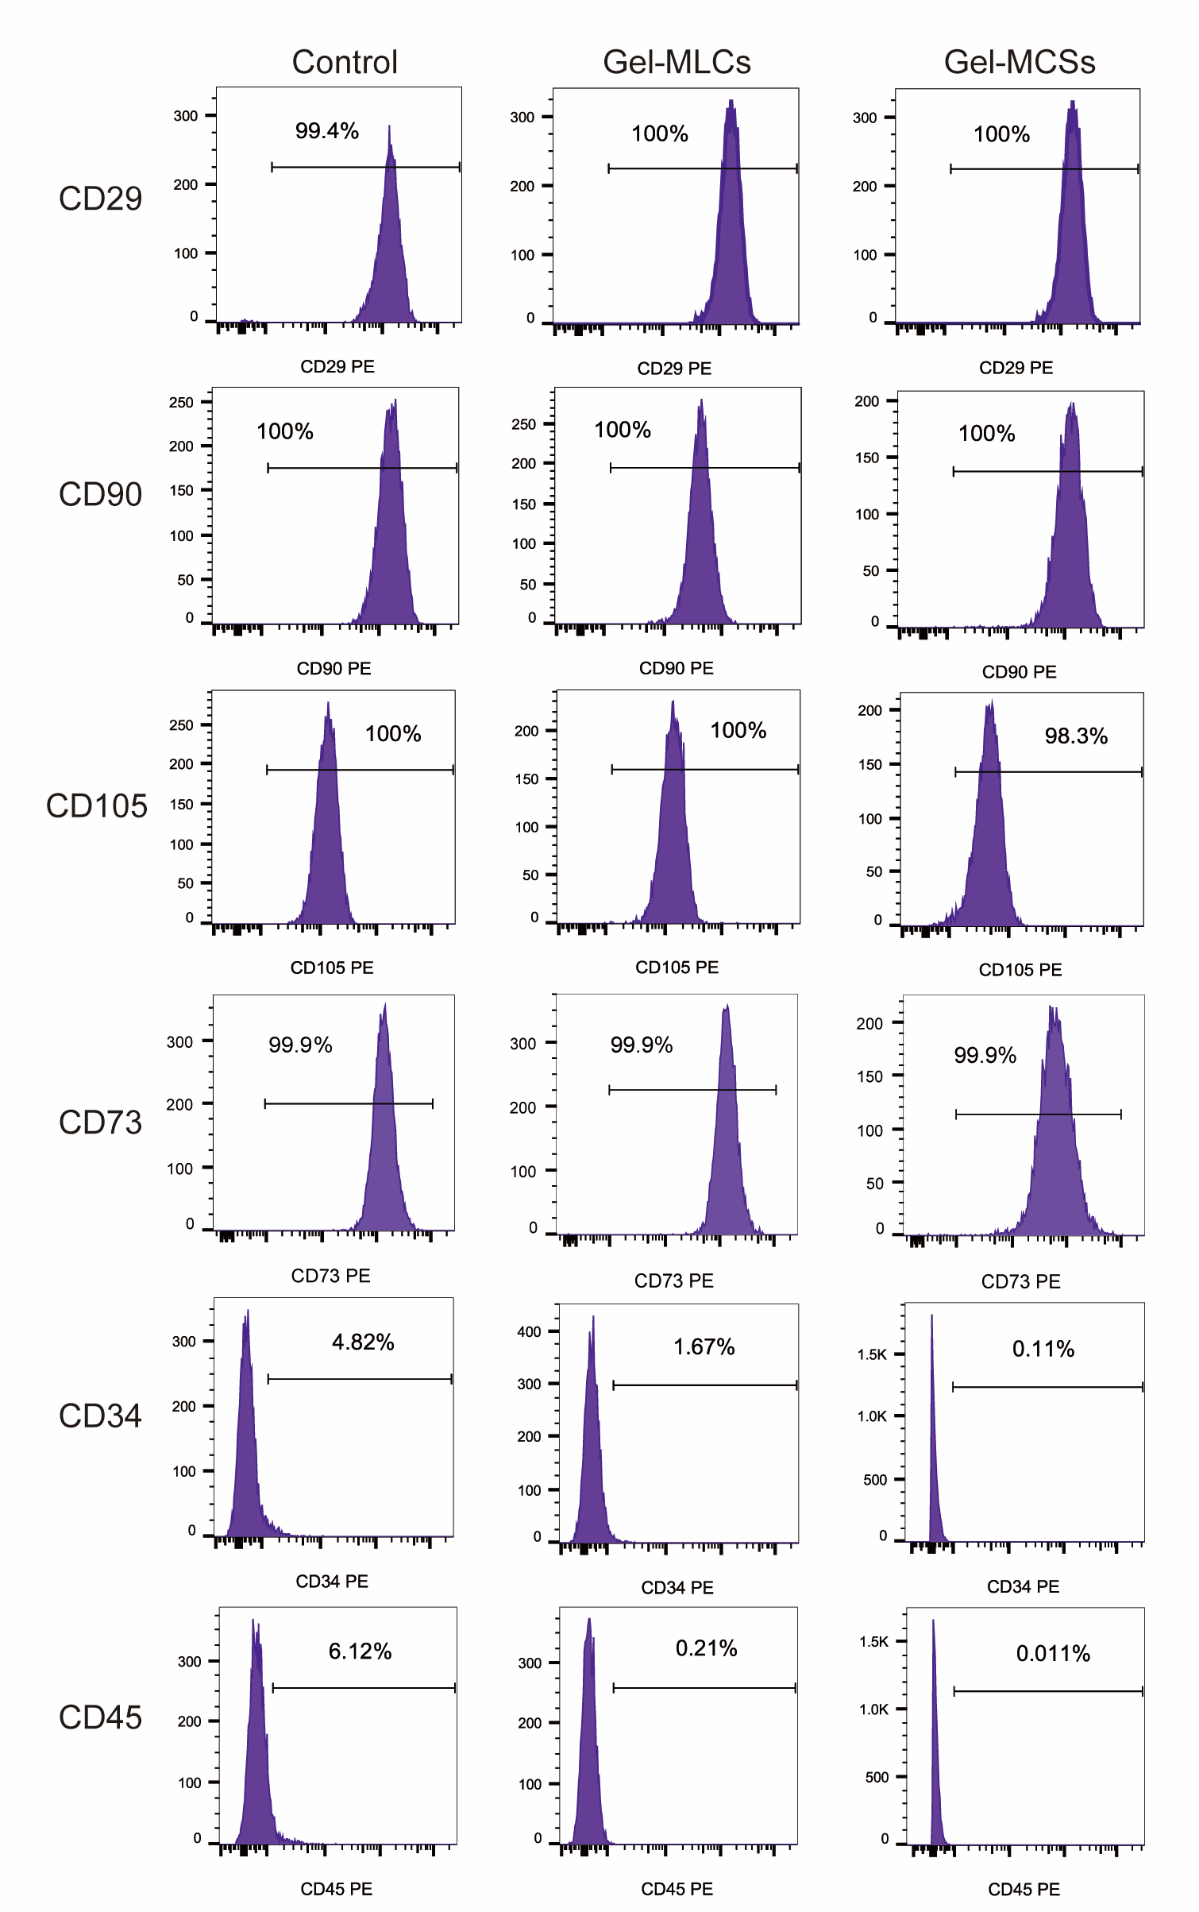


**Figure S2：**Flow cytometry results of surface markers of DPSCs from MLCs and MCSs.
